# Supplementary material for: Impact of polymorphism vs. shape of titania nanocrystals on the hydrogen evolution reaction
Source: Royal Society of Chemistry journal article supplement (doi:10.1039/d4na00479e), 2024-01-01
Supplement: d4na00479e1.pdf [file d4na00479e1.pdf]

## **Impact of Polymorphism vs Shape of Titania Nanocrystals towards Hydrogen Evolution Reaction**

Ankur Yadav<sup>a</sup>, Vivek Kumar Agrahari<sup>a</sup>, Yuriy Pihosh<sup>b</sup>, Mamiko Nakabayashi<sup>c</sup>, Wojciech Nogala<sup>d</sup>  
Balendu Sekhar Giri<sup>e</sup>, Kazunari Domen<sup>b, g</sup>, Daya Shankar Pandey<sup>a\*</sup>, Bhavana Gupta<sup>d, f\*</sup>, Subha  
Sadhu<sup>a\*</sup>

<sup>a</sup>Department of Chemistry, Institute of Science, Banaras Hindu University, Varanasi, India

<sup>b</sup>Office of University Professors, The University of Tokyo, 7-3-1 Hongo, Bunkyo-ku, Tokyo 113-8656, Japan

<sup>c</sup>Institute of Engineering Innovation, The University of Tokyo, 7-3-1 Hongo, Tokyo, 113-8656, Japan

<sup>d</sup>Institute of Physical Chemistry, Polish Academy of Sciences, Kasprzaka 44/52, 01-224 Warsaw, Poland

<sup>e</sup>Sustainability Cluster, School of Advanced Engineering, UPES, Dehradun, India.

<sup>f</sup>Department of Chemistry, Applied Sciences Cluster, School of Advanced Engineering, UPES, Dehradun, India

<sup>g</sup>Research Initiative for Supra-Materials (RISM), Shinshu University, 4-17-1 Wakasato, Nagano 380-8533, Japan

\*Email: [subha@bhu.ac.in](mailto:subha@bhu.ac.in); [bhavana.gupta@ddn.upes.ac.in](mailto:bhavana.gupta@ddn.upes.ac.in); [dspbhu@bhu.ac.in](mailto:dspbhu@bhu.ac.in)

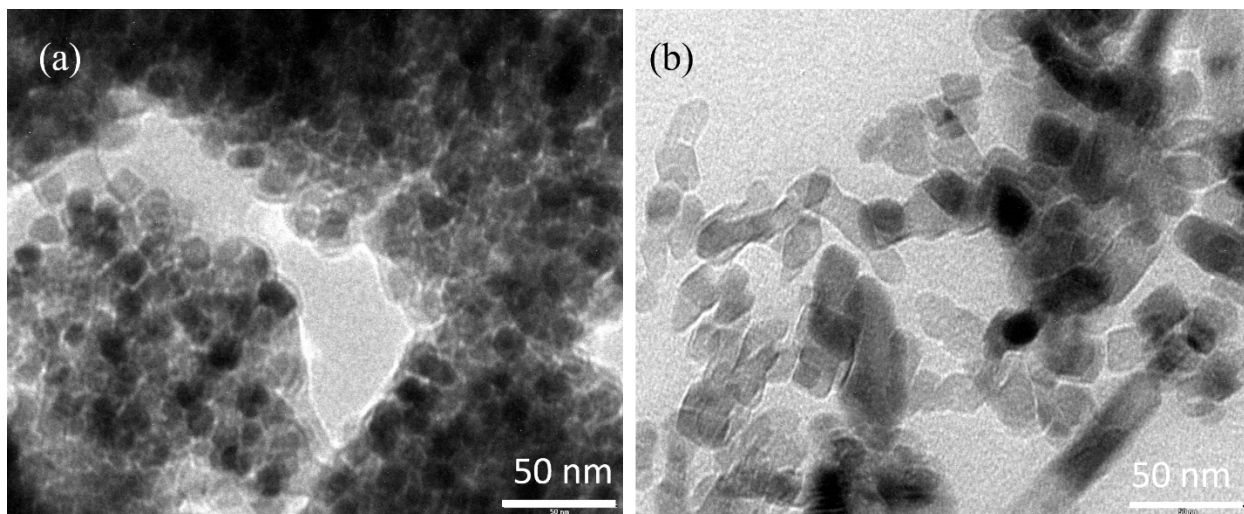

**Figure S1:** TEM images of (a) anatase granular and (b) rutile TiO<sub>2</sub> nanorod.

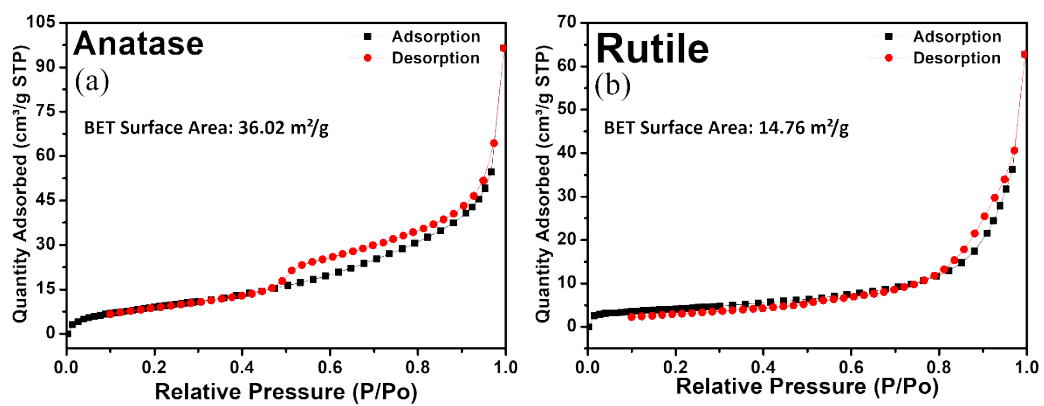

**Figure S2:** Nitrogen adsorption and desorption isotherm of (a) anatase granular and (b) rutile TiO<sub>2</sub> nanorod.

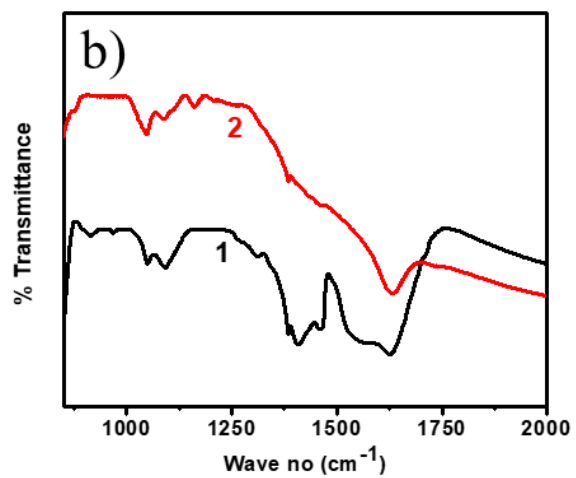

**Figure S3:** FT-IR of (1) anatase granular and (2) rutile TiO<sub>2</sub> nanorod

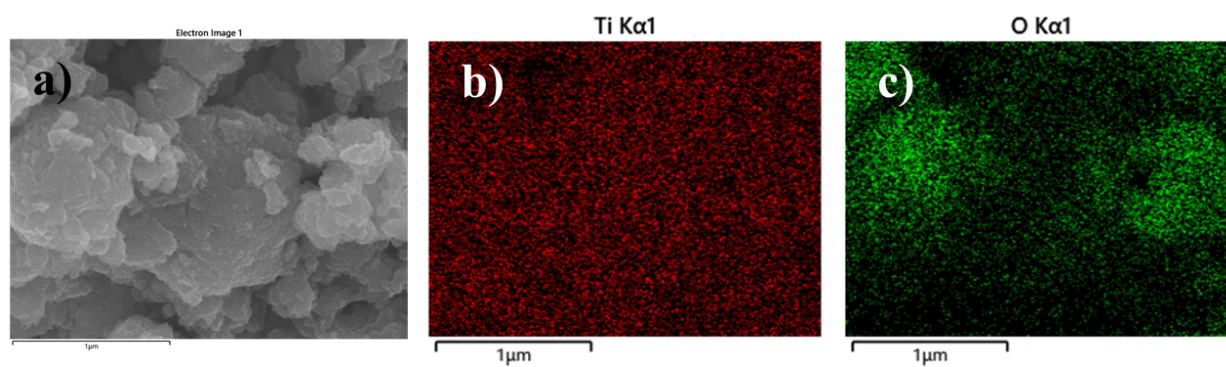

**Figure S4:** a) SEM image of anatase granular TiO<sub>2</sub> and corresponding EDAX mapping for b) Ti and c) O

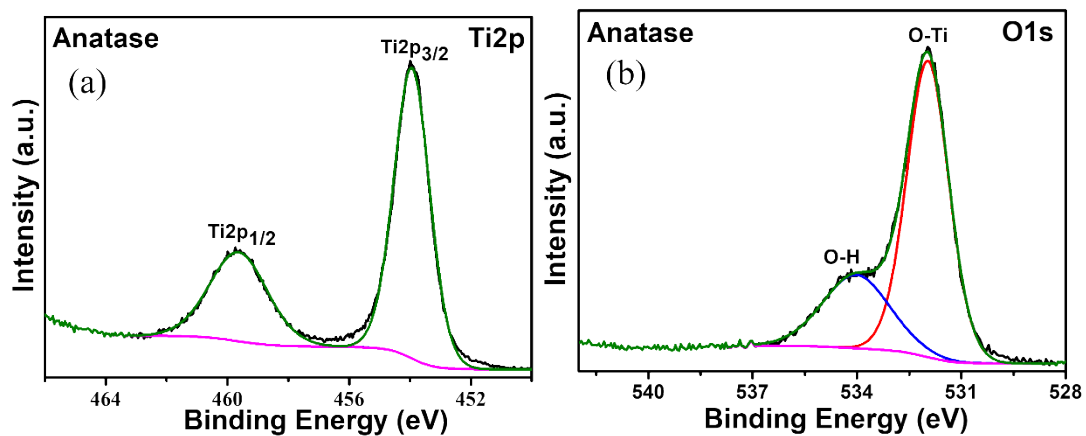

Figure S5: High resolution XPS spectra of anatase granular. (a) Ti 2p and (b) O 1s.

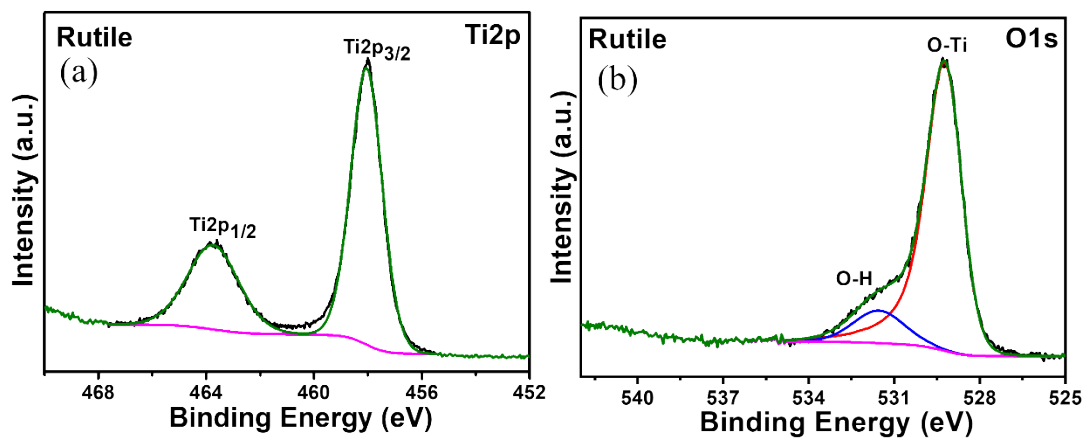

Figure S6: High resolution XPS spectra of rutile nanorod. (a) Ti 2p and (b) O 1s.

**Table S1:** XPS composition analysis of O and Ti and O: Ti ratio of anatase granular and rutile TiO<sub>2</sub> nanorod

| Nanoparticle             | Signal | ASF   | TA       | TA/ASF   | Ratio of elements | O : Ti Ratio |
|--------------------------|--------|-------|----------|----------|-------------------|--------------|
| Anatase TiO <sub>2</sub> | O1s    | 0.711 | 16561.10 | 23292.69 | 0.669             | 1 : 2.04     |
|                          | Ti2p   | 2.001 | 23096.82 | 11542.64 | 0.331             |              |
| Rutile TiO <sub>2</sub>  | O1s    | 0.711 | 16503.48 | 23211.65 | 0.701             | 1 : 2.40     |
|                          | Ti2p   | 2.001 | 19720.28 | 9855.21  | 0.298             |              |

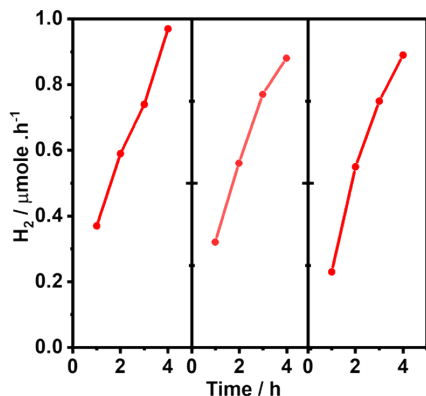

**Figure S7:** Photocatalytic H<sub>2</sub> generation was conducted using anatase granular under a 300 W Xe-lamp. The experiments involved three consecutive runs, during which we observed the maximum rate of H<sub>2</sub> generation.

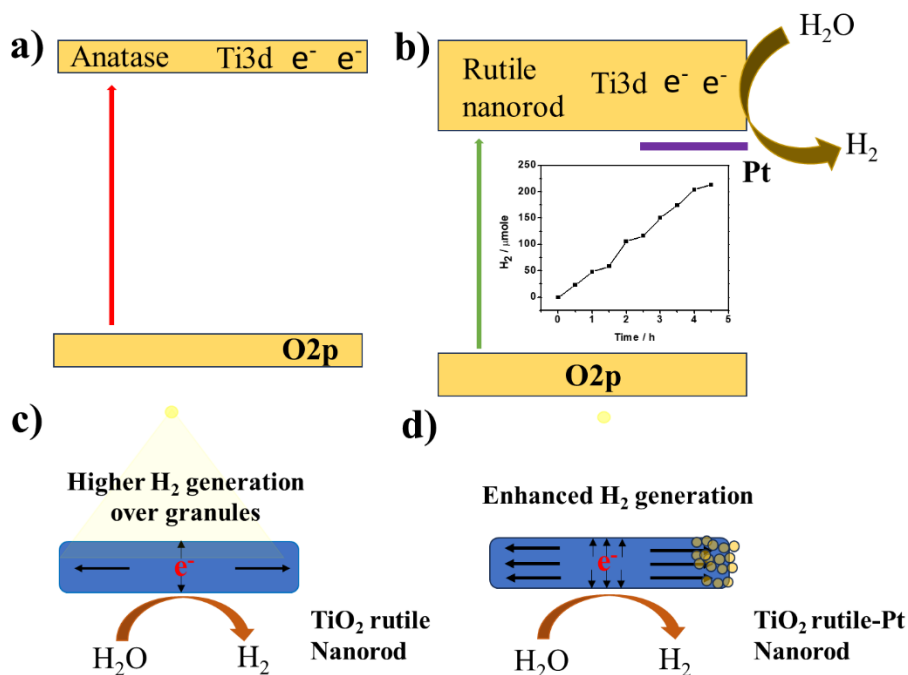

**Figure S8:** Band structure of a) anatase granular and b) rutile TiO<sub>2</sub>-Pt nanorod for charge separation (inset shows the trend and maximum rate of hydrogen generation). Mechanism of H<sub>2</sub> generation on c) rutile TiO<sub>2</sub> nanorod and d) rutile TiO<sub>2</sub>-Pt nanorod, respectively.

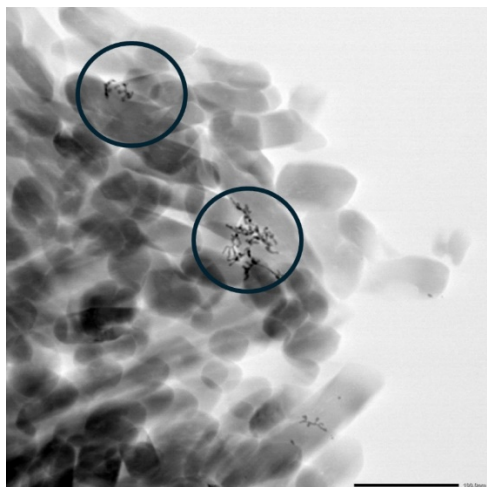

**Figure S9:** TEM image of TiO<sub>2</sub>-Pt (0.1 wt. %) after photo-deposition induced H<sub>2</sub> production.

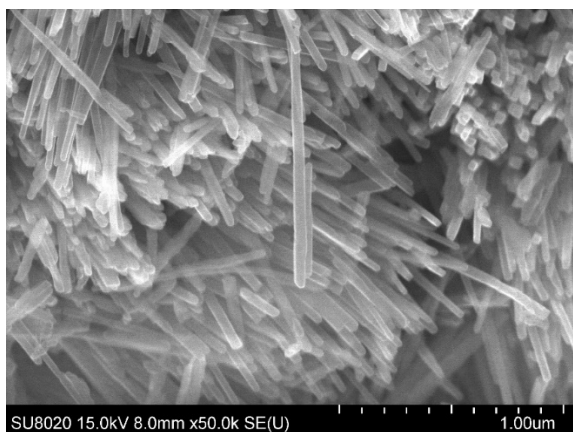

**Figure S10:** SEM image of TiO<sub>2</sub>-Pt (0.1 wt. %) after photo-deposition induced H<sub>2</sub> production. Pt deposition present within circle.

**AQE calculation formula:**

$$AQE = \frac{\text{number of reacted electrons}}{\text{number of incident photons}} * 100\%$$

$$= \frac{2 * \text{number of evolved H}_2 \text{ molecules}}{\text{number of incident photons}} * 100\%$$

$$E = \frac{nhc}{\lambda}$$

n = number of incident photon per second

h= Planck's constant

c= velocity of light

$\lambda$  = wavelength
